# Supplementary material for: WallProtDB, a database resource for plant cell wall proteomics
Source: PubMed Central journal article supplement (PMC4302427; doi:10.1186/s13007-015-0045-y), 2015-01-16
Supplement: 13007_2015_45_MOESM1_ESM.pdf [file 13007_2015_45_MOESM1_ESM.pdf]

**Additional file 1**

Altogether, *WallProtDB* contains 2170 proteins which have been classified into functional classes according to Jamet *et al.* (2008).

| Functional classes              | Proteins acting on cell wall polysaccharides | Oxido-reductases | Proteases  | Proteins related to lipid metabolism | Proteins with interacting domains (with proteins or polysaccharides) | Proteins possibly involved in signaling | Structural proteins | Proteins with yet unknown function | Miscellaneous proteins | Total number of proteins |
|---------------------------------|----------------------------------------------|------------------|------------|--------------------------------------|----------------------------------------------------------------------|-----------------------------------------|---------------------|------------------------------------|------------------------|--------------------------|
| <b>Dicots</b>                   |                                              |                  |            |                                      |                                                                      |                                         |                     |                                    |                        |                          |
| <i>Arabidopsis thaliana</i>     | 128                                          | 71               | 58         | 31                                   | 52                                                                   | 33                                      | 8                   | 61                                 | 53                     | 495                      |
| <i>Brassica oleracea</i>        | 48                                           | 39               | 28         | 8                                    | 8                                                                    | 9                                       | 0                   | 9                                  | 13                     | 162                      |
| <i>Gossypium hirsutum</i>       | 39                                           | 19               | 9          | 9                                    | 3                                                                    | 13                                      | 0                   | 8                                  | 16                     | 116                      |
| <i>Linum usitatissimum</i>      | 23                                           | 24               | 9          | 9                                    | 8                                                                    | 4                                       | 1                   | 11                                 | 17                     | 106                      |
| <i>Medicago sativa</i>          | 43                                           | 34               | 29         | 13                                   | 30                                                                   | 14                                      | 2                   | 13                                 | 21                     | 199                      |
| <i>Populus spp</i>              | 48                                           | 33               | 20         | 13                                   | 1                                                                    | 7                                       | 0                   | 13                                 | 7                      | 142                      |
| <i>Solanum lycopersicum</i>     | 41                                           | 17               | 26         | 19                                   | 22                                                                   | 5                                       | 1                   | 10                                 | 20                     | 161                      |
| <i>Solanum tuberosum</i>        | 44                                           | 13               | 26         | 10                                   | 9                                                                    | 1                                       | 0                   | 8                                  | 25                     | 136                      |
| <b>Monocots</b>                 |                                              |                  |            |                                      |                                                                      |                                         |                     |                                    |                        |                          |
| <i>Brachypodium distachyon</i>  | 73                                           | 52               | 45         | 28                                   | 17                                                                   | 14                                      | 0                   | 50                                 | 35                     | 314                      |
| <i>Oryza sativa</i>             | 83                                           | 36               | 32         | 26                                   | 22                                                                   | 7                                       | 8                   | 26                                 | 30                     | 270                      |
| <i>Saccharum officinarum</i>    | 8                                            | 21               | 6          | 3                                    | 8                                                                    | 1                                       | 0                   | 8                                  | 14                     | 69                       |
| <b>Total number of proteins</b> | <b>578</b>                                   | <b>359</b>       | <b>288</b> | <b>169</b>                           | <b>180</b>                                                           | <b>108</b>                              | <b>20</b>           | <b>217</b>                         | <b>251</b>             | <b>2170</b>              |
